# Supplementary material
Source: PubMed Central journal article supplement (PMC5490491)

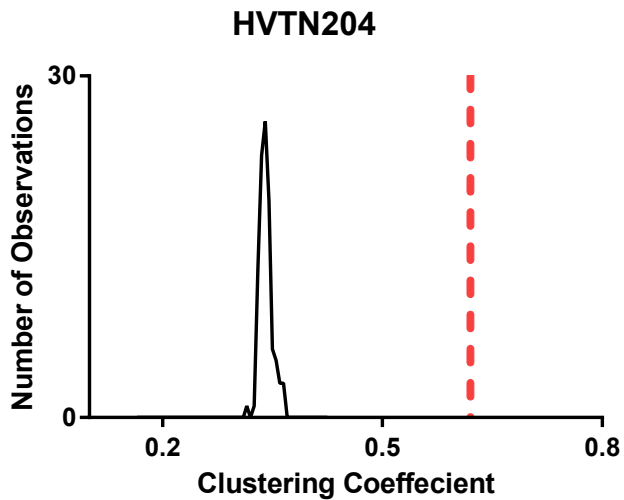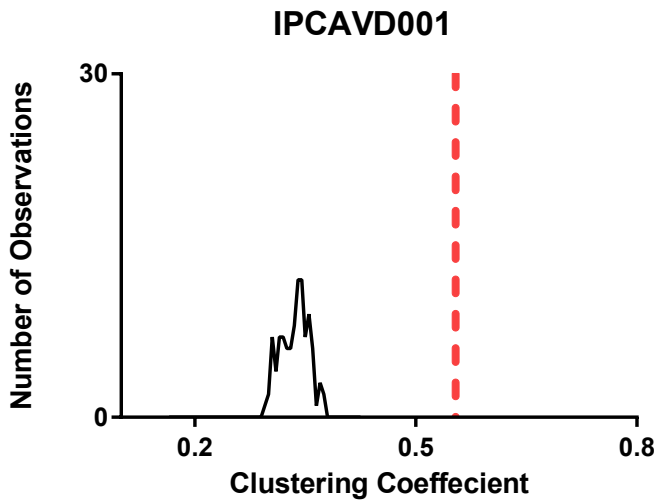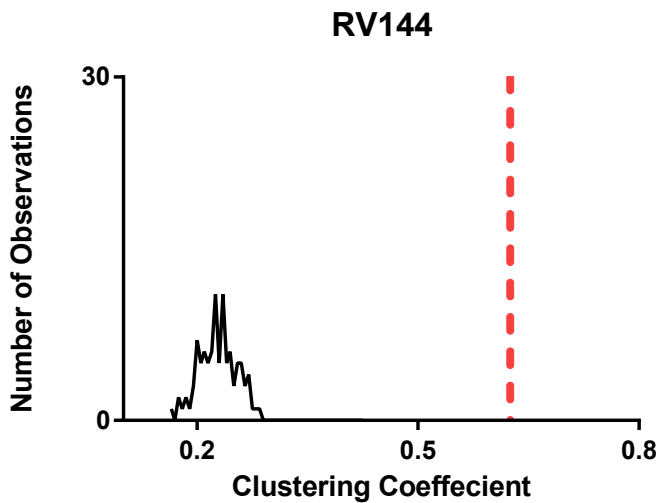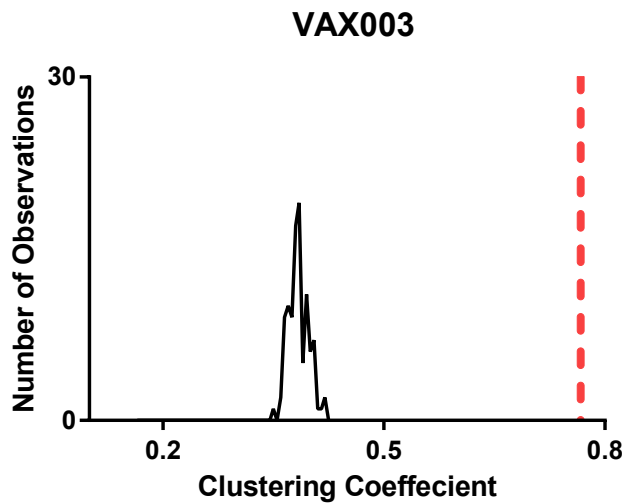

Supplement: NIHMS734264-supplement-3.pdf [file NIHMS734264-supplement-3.pdf]

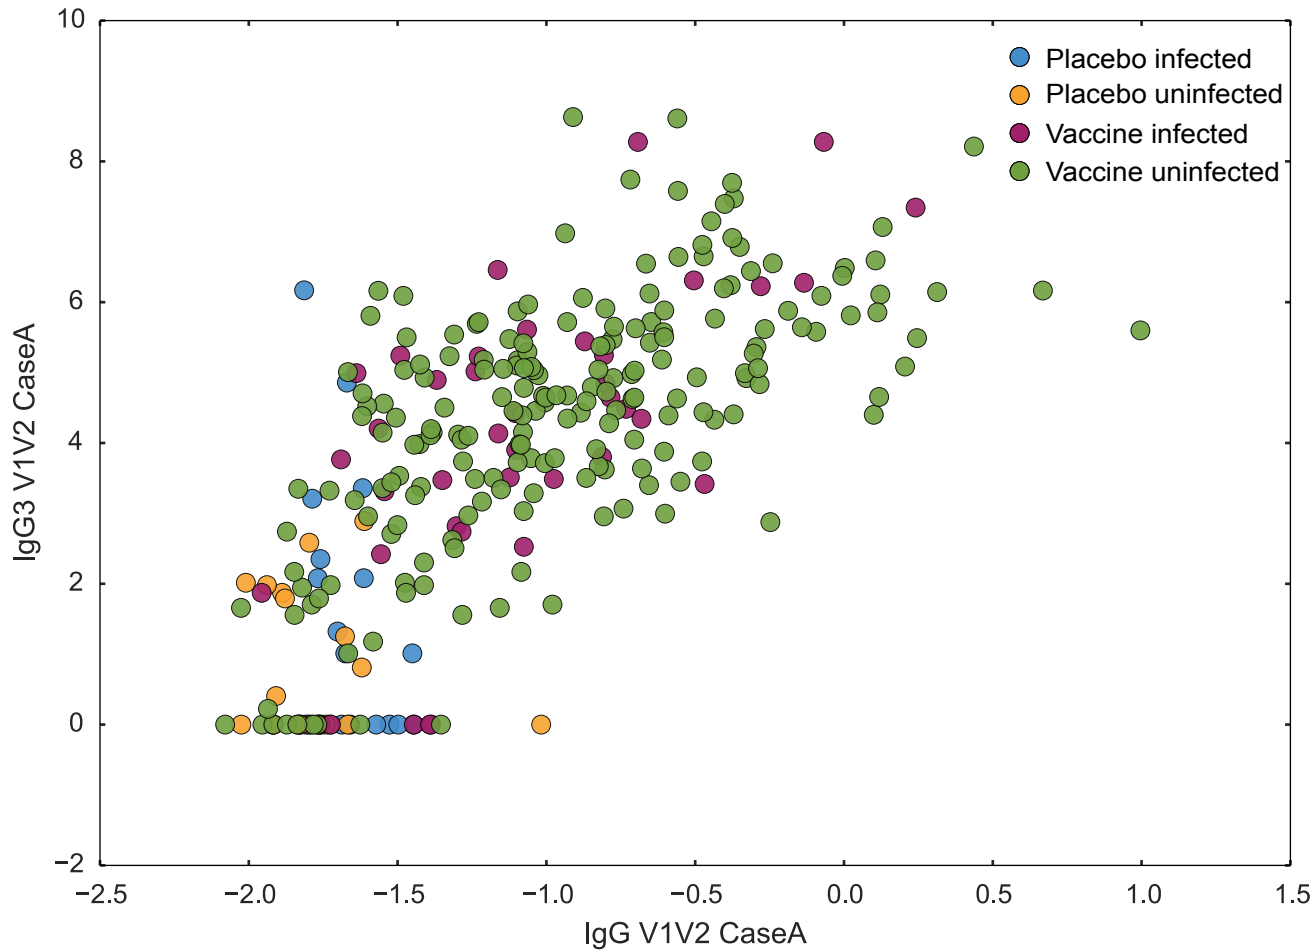

Supplement: NIHMS734264-supplement-5.pdf [file NIHMS734264-supplement-5.pdf]
